# Supplementary material
Source: publisher figshare collection journal article supplement (https://acs.figshare.com/ndownloader/files/4506313)
Supplement: Supplementary file 1 [file 4506313]

  
data_cd28504 
  
_audit_creation_method            SHELXL-97 
_chemical_name_systematic 
; 
 ? 
; 
_chemical_name_common             ? 
_chemical_melting_point           ? 
_chemical_formula_moiety          ? 
_chemical_formula_sum 
 'C27 H26 O4' 
_chemical_formula_weight          414.48 
  
loop_ 
 _atom_type_symbol 
 _atom_type_description 
 _atom_type_scat_dispersion_real 
 _atom_type_scat_dispersion_imag 
 _atom_type_scat_source 
 'C'  'C'   0.0033   0.0016 
 'International Tables Vol C Tables 4.2.6.8 and 6.1.1.4' 
 'H'  'H'   0.0000   0.0000 
 'International Tables Vol C Tables 4.2.6.8 and 6.1.1.4' 
 'O'  'O'   0.0106   0.0060 
 'International Tables Vol C Tables 4.2.6.8 and 6.1.1.4' 
  
_symmetry_cell_setting            Monoclinic 
_symmetry_space_group_name_H-M    P2(1)/c 
  
loop_ 
 _symmetry_equiv_pos_as_xyz 
 'x, y, z' 
 '-x, y+1/2, -z+1/2' 
 '-x, -y, -z' 
 'x, -y-1/2, z-1/2' 
  
_cell_length_a                    14.2746(13) 
_cell_length_b                    15.1428(15) 
_cell_length_c                    10.7242(10) 
_cell_angle_alpha                 90.00 
_cell_angle_beta                  111.083(2) 
_cell_angle_gamma                 90.00 
_cell_volume                      2162.9(4) 
_cell_formula_units_Z             4 
_cell_measurement_temperature     293(2) 
_cell_measurement_reflns_used     1665 
_cell_measurement_theta_min       4.879 
_cell_measurement_theta_max       40.588 
  
_exptl_crystal_description        prismatic 
_exptl_crystal_colour             colorless 
_exptl_crystal_size_max           0.292 
_exptl_crystal_size_mid           0.279 
_exptl_crystal_size_min           0.211 
_exptl_crystal_density_meas       ? 
_exptl_crystal_density_diffrn     1.273 
_exptl_crystal_density_method     'not measured' 
_exptl_crystal_F_000              880 
_exptl_absorpt_coefficient_mu     0.084 
_exptl_absorpt_correction_type    empirical 
_exptl_absorpt_correction_T_min   0.76897 
_exptl_absorpt_correction_T_max   1.00000 
_exptl_absorpt_process_details    sadabs 
  
_exptl_special_details 
; 
 ? 
; 
  
_diffrn_ambient_temperature       293(2) 
_diffrn_radiation_wavelength      0.71073 
_diffrn_radiation_type            MoK\a 
_diffrn_radiation_source          'fine-focus sealed tube' 
_diffrn_radiation_monochromator   graphite 
_diffrn_measurement_device_type   'CCD area detector' 
_diffrn_measurement_method        'phi and omega scans' 
_diffrn_detector_area_resol_mean  ? 
_diffrn_standards_number          ? 
_diffrn_standards_interval_count  ? 
_diffrn_standards_interval_time   ? 
_diffrn_standards_decay_%         ? 
_diffrn_reflns_number             12138 
_diffrn_reflns_av_R_equivalents   0.0666 
_diffrn_reflns_av_sigmaI/netI     0.0797 
_diffrn_reflns_limit_h_min        -15 
_diffrn_reflns_limit_h_max        17 
_diffrn_reflns_limit_k_min        -19 
_diffrn_reflns_limit_k_max        14 
_diffrn_reflns_limit_l_min        -13 
_diffrn_reflns_limit_l_max        12 
_diffrn_reflns_theta_min          2.04 
_diffrn_reflns_theta_max          26.49 
_reflns_number_total              4472 
_reflns_number_gt                 2502 
_reflns_threshold_expression      >2sigma(I) 
  
_computing_data_collection        'Bruker SMART' 
_computing_cell_refinement        'Bruker SMART' 
_computing_data_reduction         'Bruker SHELXTL' 
_computing_structure_solution     'SHELXS-97 (Sheldrick, 1990)' 
_computing_structure_refinement   'SHELXL-97 (Sheldrick, 1997)' 
_computing_molecular_graphics     'Bruker SHELXTL' 
_computing_publication_material   'Bruker SHELXTL' 
  
_refine_special_details 
; 
 Refinement of F^2^ against ALL reflections.  The weighted R-factor wR and 
 goodness of fit S are based on F^2^, conventional R-factors R are based 
 on F, with F set to zero for negative F^2^. The threshold expression of 
 F^2^ > 2sigma(F^2^) is used only for calculating R-factors(gt) etc. and is 
 not relevant to the choice of reflections for refinement.  R-factors based 
 on F^2^ are statistically about twice as large as those based on F, and R- 
 factors based on ALL data will be even larger. 
; 
  
_refine_ls_structure_factor_coef  Fsqd 
_refine_ls_matrix_type            full 
_refine_ls_weighting_scheme       calc 
_refine_ls_weighting_details 
 'calc w=1/[\s^2^(Fo^2^)+(0.0547P)^2^+0.0000P] where P=(Fo^2^+2Fc^2^)/3' 
_atom_sites_solution_primary      direct 
_atom_sites_solution_secondary    difmap 
_atom_sites_solution_hydrogens    geom 
_refine_ls_hydrogen_treatment     constr 
_refine_ls_extinction_method      SHELXL 
_refine_ls_extinction_coef        ? 
_refine_ls_extinction_expression 
 'Fc^*^=kFc[1+0.001xFc^2^\l^3^/sin(2\q)]^-1/4^' 
_refine_ls_number_reflns          4472 
_refine_ls_number_parameters      285 
_refine_ls_number_restraints      0 
_refine_ls_R_factor_all           0.1095 
_refine_ls_R_factor_gt            0.0585 
_refine_ls_wR_factor_ref          0.1444 
_refine_ls_wR_factor_gt           0.1252 
_refine_ls_goodness_of_fit_ref    0.929 
_refine_ls_restrained_S_all       0.929 
_refine_ls_shift/su_max           0.005 
_refine_ls_shift/su_mean          0.000 
  
loop_ 
 _atom_site_label 
 _atom_site_type_symbol 
 _atom_site_fract_x 
 _atom_site_fract_y 
 _atom_site_fract_z 
 _atom_site_U_iso_or_equiv 
 _atom_site_adp_type 
 _atom_site_occupancy 
 _atom_site_symmetry_multiplicity 
 _atom_site_calc_flag 
 _atom_site_refinement_flags 
 _atom_site_disorder_assembly 
 _atom_site_disorder_group 
O1 O 0.33990(14) 0.46028(13) 0.73607(17) 0.0688(6) Uani 1 1 d . . . 
H1 H 0.3116 0.4857 0.7801 0.103 Uiso 1 1 calc R . . 
O2 O 0.31908(13) 0.53945(11) -0.03845(14) 0.0542(5) Uani 1 1 d . . . 
O3 O 0.14761(15) 0.44509(14) -0.09384(16) 0.0738(6) Uani 1 1 d . . . 
O4 O 0.55185(13) 0.30111(12) 0.25357(17) 0.0642(5) Uani 1 1 d . . . 
C1 C 0.2692(2) 0.42219(17) 0.6254(2) 0.0539(7) Uani 1 1 d . . . 
C2 C 0.1682(2) 0.4292(2) 0.5963(3) 0.0728(9) Uani 1 1 d . . . 
H2 H 0.1439 0.4622 0.6512 0.087 Uiso 1 1 calc R . . 
C3 C 0.1025(2) 0.3874(2) 0.4854(3) 0.0720(9) Uani 1 1 d . . . 
H3 H 0.0339 0.3918 0.4673 0.086 Uiso 1 1 calc R . . 
C4 C 0.1363(2) 0.33861(18) 0.3996(3) 0.0579(7) Uani 1 1 d . . . 
C5 C 0.23983(18) 0.33408(15) 0.4276(2) 0.0444(6) Uani 1 1 d . . . 
C6 C 0.30624(18) 0.37430(15) 0.5415(2) 0.0439(6) Uani 1 1 d . . . 
C7 C 0.41747(18) 0.36518(16) 0.5850(2) 0.0481(6) Uani 1 1 d . . . 
H7A H 0.4413 0.3342 0.6699 0.058 Uiso 1 1 calc R . . 
H7B H 0.4467 0.4238 0.6004 0.058 Uiso 1 1 calc R . . 
C8 C 0.45695(17) 0.31662(15) 0.4881(2) 0.0416(6) Uani 1 1 d . . . 
H8 H 0.5207 0.2885 0.5409 0.050 Uiso 1 1 calc R . . 
C9 C 0.38382(17) 0.24462(15) 0.4160(2) 0.0462(6) Uani 1 1 d . . . 
H9A H 0.3752 0.2035 0.4804 0.055 Uiso 1 1 calc R . . 
H9B H 0.4098 0.2123 0.3574 0.055 Uiso 1 1 calc R . . 
C10 C 0.28375(17) 0.28608(15) 0.3351(2) 0.0432(6) Uani 1 1 d . . . 
H10 H 0.2372 0.2395 0.2868 0.052 Uiso 1 1 calc R . . 
C11 C 0.29705(17) 0.35106(15) 0.2343(2) 0.0418(6) Uani 1 1 d . . . 
C12 C 0.38666(17) 0.39648(14) 0.2618(2) 0.0377(5) Uani 1 1 d . . . 
C13 C 0.47666(16) 0.37960(14) 0.3865(2) 0.0381(5) Uani 1 1 d . . . 
H13 H 0.4981 0.4365 0.4312 0.046 Uiso 1 1 calc R . . 
C14 C 0.39474(17) 0.46012(15) 0.1716(2) 0.0418(6) Uani 1 1 d . . . 
H14 H 0.4548 0.4907 0.1907 0.050 Uiso 1 1 calc R . . 
C15 C 0.31571(18) 0.47848(15) 0.0550(2) 0.0425(6) Uani 1 1 d . . . 
C16 C 0.22693(18) 0.43183(17) 0.0260(2) 0.0482(6) Uani 1 1 d . . . 
C17 C 0.21834(18) 0.36911(16) 0.1138(2) 0.0493(6) Uani 1 1 d . . . 
H17 H 0.1586 0.3377 0.0926 0.059 Uiso 1 1 calc R . . 
C18 C 0.56467(18) 0.34176(15) 0.3554(2) 0.0444(6) Uani 1 1 d . . . 
C19 C 0.66898(18) 0.35244(16) 0.4558(2) 0.0491(6) Uani 1 1 d . . . 
C20 C 0.6915(2) 0.40373(19) 0.5706(3) 0.0647(8) Uani 1 1 d . . . 
H20 H 0.6399 0.4322 0.5883 0.078 Uiso 1 1 calc R . . 
C21 C 0.7889(2) 0.4130(2) 0.6583(3) 0.0909(11) Uani 1 1 d . . . 
H21 H 0.8028 0.4480 0.7341 0.109 Uiso 1 1 calc R . . 
C22 C 0.8649(3) 0.3706(3) 0.6341(4) 0.1090(13) Uani 1 1 d . . . 
H22 H 0.9307 0.3769 0.6932 0.131 Uiso 1 1 calc R . . 
C23 C 0.8445(3) 0.3188(3) 0.5225(4) 0.1017(12) Uani 1 1 d . . . 
H23 H 0.8964 0.2896 0.5067 0.122 Uiso 1 1 calc R . . 
C24 C 0.7467(2) 0.3099(2) 0.4333(3) 0.0780(9) Uani 1 1 d . . . 
H24 H 0.7335 0.2749 0.3576 0.094 Uiso 1 1 calc R . . 
C25 C 0.0608(2) 0.2899(2) 0.2843(3) 0.0883(10) Uani 1 1 d . . . 
H25A H 0.0542 0.3190 0.2021 0.132 Uiso 1 1 calc R . . 
H25B H -0.0031 0.2894 0.2954 0.132 Uiso 1 1 calc R . . 
H25C H 0.0831 0.2303 0.2822 0.132 Uiso 1 1 calc R . . 
C26 C 0.3966(2) 0.60335(19) 0.0014(3) 0.0760(9) Uani 1 1 d . . . 
H26A H 0.3943 0.6347 0.0781 0.114 Uiso 1 1 calc R . . 
H26B H 0.3876 0.6441 -0.0705 0.114 Uiso 1 1 calc R . . 
H26C H 0.4605 0.5745 0.0238 0.114 Uiso 1 1 calc R . . 
C27 C 0.0946(3) 0.5233(3) -0.1038(3) 0.1184(15) Uani 1 1 d . . . 
H27A H 0.0767 0.5302 -0.0262 0.141 Uiso 1 1 calc R . . 
H27B H 0.0348 0.5216 -0.1824 0.141 Uiso 1 1 calc R . . 
H27C H 0.1357 0.5721 -0.1098 0.141 Uiso 1 1 calc R . . 
  
loop_ 
 _atom_site_aniso_label 
 _atom_site_aniso_U_11 
 _atom_site_aniso_U_22 
 _atom_site_aniso_U_33 
 _atom_site_aniso_U_23 
 _atom_site_aniso_U_13 
 _atom_site_aniso_U_12 
O1 0.0934(14) 0.0746(15) 0.0467(11) -0.0108(10) 0.0353(11) 0.0092(11) 
O2 0.0761(12) 0.0530(12) 0.0344(9) 0.0077(8) 0.0210(8) -0.0061(9) 
O3 0.0830(14) 0.0824(16) 0.0384(10) 0.0062(10) 0.0006(10) 0.0045(11) 
O4 0.0698(12) 0.0767(14) 0.0529(11) -0.0210(10) 0.0304(10) -0.0022(10) 
C1 0.073(2) 0.0534(17) 0.0429(15) 0.0063(13) 0.0292(14) 0.0090(14) 
C2 0.090(2) 0.085(2) 0.0630(19) 0.0095(17) 0.0504(18) 0.0228(18) 
C3 0.0605(19) 0.093(2) 0.076(2) 0.0143(19) 0.0410(17) 0.0123(17) 
C4 0.0534(17) 0.0656(19) 0.0591(17) 0.0066(15) 0.0254(14) -0.0054(14) 
C5 0.0562(16) 0.0433(15) 0.0393(13) 0.0065(11) 0.0241(12) -0.0039(12) 
C6 0.0608(16) 0.0428(15) 0.0351(13) 0.0065(11) 0.0259(12) 0.0029(12) 
C7 0.0665(17) 0.0510(16) 0.0314(12) -0.0010(11) 0.0232(12) 0.0003(13) 
C8 0.0510(15) 0.0417(15) 0.0338(12) 0.0050(11) 0.0174(11) 0.0034(11) 
C9 0.0640(16) 0.0368(14) 0.0460(14) 0.0018(12) 0.0298(13) 0.0013(12) 
C10 0.0528(15) 0.0392(14) 0.0414(13) -0.0059(11) 0.0214(12) -0.0103(12) 
C11 0.0536(15) 0.0394(14) 0.0356(13) -0.0050(11) 0.0198(12) -0.0022(12) 
C12 0.0499(14) 0.0371(13) 0.0299(12) -0.0037(10) 0.0190(11) -0.0008(11) 
C13 0.0508(14) 0.0330(13) 0.0315(12) -0.0032(10) 0.0160(11) -0.0024(10) 
C14 0.0532(15) 0.0403(14) 0.0355(13) -0.0031(11) 0.0204(12) -0.0060(11) 
C15 0.0633(16) 0.0397(15) 0.0295(12) 0.0012(11) 0.0228(12) 0.0009(12) 
C16 0.0561(16) 0.0543(17) 0.0299(13) -0.0024(12) 0.0102(12) -0.0017(13) 
C17 0.0518(15) 0.0542(17) 0.0407(14) -0.0056(12) 0.0153(12) -0.0095(12) 
C18 0.0588(16) 0.0413(15) 0.0397(13) 0.0018(12) 0.0257(12) -0.0018(12) 
C19 0.0484(15) 0.0480(16) 0.0530(15) 0.0070(13) 0.0206(13) 0.0009(12) 
C20 0.0553(18) 0.069(2) 0.0551(17) -0.0046(15) 0.0022(14) 0.0031(15) 
C21 0.077(2) 0.089(3) 0.078(2) -0.0022(19) -0.008(2) 0.013(2) 
C22 0.070(3) 0.095(3) 0.122(3) 0.005(3) -0.013(2) 0.001(2) 
C23 0.060(2) 0.109(3) 0.136(3) 0.003(3) 0.035(2) 0.015(2) 
C24 0.064(2) 0.082(2) 0.092(2) -0.0022(18) 0.0319(18) 0.0068(17) 
C25 0.061(2) 0.111(3) 0.094(2) -0.006(2) 0.0297(18) -0.0158(18) 
C26 0.113(3) 0.059(2) 0.0568(17) 0.0122(15) 0.0305(17) -0.0158(18) 
C27 0.089(3) 0.155(4) 0.084(3) 0.010(3) 0.010(2) 0.047(3) 
  
_geom_special_details 
; 
 All esds (except the esd in the dihedral angle between two l.s. planes) 
 are estimated using the full covariance matrix.  The cell esds are taken 
 into account individually in the estimation of esds in distances, angles 
 and torsion angles; correlations between esds in cell parameters are only 
 used when they are defined by crystal symmetry.  An approximate (isotropic) 
 treatment of cell esds is used for estimating esds involving l.s. planes. 
; 
  
loop_ 
 _geom_bond_atom_site_label_1 
 _geom_bond_atom_site_label_2 
 _geom_bond_distance 
 _geom_bond_site_symmetry_2 
 _geom_bond_publ_flag 
O1 C1 1.378(3) . ? 
O1 H1 0.8200 . ? 
O2 C15 1.376(2) . ? 
O2 C26 1.416(3) . ? 
O3 C16 1.388(3) . ? 
O3 C27 1.388(4) . ? 
O4 C18 1.209(2) . ? 
C1 C2 1.365(4) . ? 
C1 C6 1.399(3) . ? 
C2 C3 1.375(4) . ? 
C2 H2 0.9300 . ? 
C3 C4 1.395(4) . ? 
C3 H3 0.9300 . ? 
C4 C5 1.400(3) . ? 
C4 C25 1.509(4) . ? 
C5 C6 1.388(3) . ? 
C5 C10 1.535(3) . ? 
C6 C7 1.492(3) . ? 
C7 C8 1.536(3) . ? 
C7 H7A 0.9700 . ? 
C7 H7B 0.9700 . ? 
C8 C9 1.515(3) . ? 
C8 C13 1.548(3) . ? 
C8 H8 0.9800 . ? 
C9 C10 1.515(3) . ? 
C9 H9A 0.9700 . ? 
C9 H9B 0.9700 . ? 
C10 C11 1.523(3) . ? 
C10 H10 0.9800 . ? 
C11 C12 1.387(3) . ? 
C11 C17 1.401(3) . ? 
C12 C14 1.400(3) . ? 
C12 C13 1.506(3) . ? 
C13 C18 1.523(3) . ? 
C13 H13 0.9800 . ? 
C14 C15 1.378(3) . ? 
C14 H14 0.9300 . ? 
C15 C16 1.385(3) . ? 
C16 C17 1.374(3) . ? 
C17 H17 0.9300 . ? 
C18 C19 1.500(3) . ? 
C19 C24 1.378(4) . ? 
C19 C20 1.392(3) . ? 
C20 C21 1.377(4) . ? 
C20 H20 0.9300 . ? 
C21 C22 1.363(5) . ? 
C21 H21 0.9300 . ? 
C22 C23 1.371(5) . ? 
C22 H22 0.9300 . ? 
C23 C24 1.386(4) . ? 
C23 H23 0.9300 . ? 
C24 H24 0.9300 . ? 
C25 H25A 0.9600 . ? 
C25 H25B 0.9600 . ? 
C25 H25C 0.9600 . ? 
C26 H26A 0.9600 . ? 
C26 H26B 0.9600 . ? 
C26 H26C 0.9600 . ? 
C27 H27A 0.9600 . ? 
C27 H27B 0.9600 . ? 
C27 H27C 0.9600 . ? 
  
loop_ 
 _geom_angle_atom_site_label_1 
 _geom_angle_atom_site_label_2 
 _geom_angle_atom_site_label_3 
 _geom_angle 
 _geom_angle_site_symmetry_1 
 _geom_angle_site_symmetry_3 
 _geom_angle_publ_flag 
C1 O1 H1 109.5 . . ? 
C15 O2 C26 117.83(18) . . ? 
C16 O3 C27 115.8(2) . . ? 
C2 C1 O1 123.4(2) . . ? 
C2 C1 C6 120.4(3) . . ? 
O1 C1 C6 116.2(2) . . ? 
C1 C2 C3 119.8(3) . . ? 
C1 C2 H2 120.1 . . ? 
C3 C2 H2 120.1 . . ? 
C2 C3 C4 121.7(3) . . ? 
C2 C3 H3 119.2 . . ? 
C4 C3 H3 119.2 . . ? 
C3 C4 C5 118.2(3) . . ? 
C3 C4 C25 119.0(3) . . ? 
C5 C4 C25 122.7(2) . . ? 
C6 C5 C4 120.1(2) . . ? 
C6 C5 C10 117.9(2) . . ? 
C4 C5 C10 122.0(2) . . ? 
C5 C6 C1 119.8(2) . . ? 
C5 C6 C7 123.2(2) . . ? 
C1 C6 C7 116.9(2) . . ? 
C6 C7 C8 116.16(19) . . ? 
C6 C7 H7A 108.2 . . ? 
C8 C7 H7A 108.2 . . ? 
C6 C7 H7B 108.2 . . ? 
C8 C7 H7B 108.2 . . ? 
H7A C7 H7B 107.4 . . ? 
C9 C8 C7 109.67(18) . . ? 
C9 C8 C13 110.53(17) . . ? 
C7 C8 C13 112.64(19) . . ? 
C9 C8 H8 107.9 . . ? 
C7 C8 H8 107.9 . . ? 
C13 C8 H8 107.9 . . ? 
C8 C9 C10 109.19(19) . . ? 
C8 C9 H9A 109.8 . . ? 
C10 C9 H9A 109.8 . . ? 
C8 C9 H9B 109.8 . . ? 
C10 C9 H9B 109.8 . . ? 
H9A C9 H9B 108.3 . . ? 
C9 C10 C11 109.99(18) . . ? 
C9 C10 C5 110.23(18) . . ? 
C11 C10 C5 109.71(18) . . ? 
C9 C10 H10 109.0 . . ? 
C11 C10 H10 109.0 . . ? 
C5 C10 H10 109.0 . . ? 
C12 C11 C17 118.1(2) . . ? 
C12 C11 C10 120.7(2) . . ? 
C17 C11 C10 121.2(2) . . ? 
C11 C12 C14 119.5(2) . . ? 
C11 C12 C13 122.11(19) . . ? 
C14 C12 C13 118.3(2) . . ? 
C12 C13 C18 112.12(17) . . ? 
C12 C13 C8 114.61(18) . . ? 
C18 C13 C8 107.19(18) . . ? 
C12 C13 H13 107.5 . . ? 
C18 C13 H13 107.5 . . ? 
C8 C13 H13 107.5 . . ? 
C15 C14 C12 121.5(2) . . ? 
C15 C14 H14 119.3 . . ? 
C12 C14 H14 119.3 . . ? 
O2 C15 C14 124.4(2) . . ? 
O2 C15 C16 116.6(2) . . ? 
C14 C15 C16 119.1(2) . . ? 
C17 C16 C15 119.9(2) . . ? 
C17 C16 O3 119.4(2) . . ? 
C15 C16 O3 120.7(2) . . ? 
C16 C17 C11 121.8(2) . . ? 
C16 C17 H17 119.1 . . ? 
C11 C17 H17 119.1 . . ? 
O4 C18 C19 119.5(2) . . ? 
O4 C18 C13 121.4(2) . . ? 
C19 C18 C13 119.1(2) . . ? 
C24 C19 C20 118.2(3) . . ? 
C24 C19 C18 118.6(2) . . ? 
C20 C19 C18 123.3(2) . . ? 
C21 C20 C19 121.0(3) . . ? 
C21 C20 H20 119.5 . . ? 
C19 C20 H20 119.5 . . ? 
C22 C21 C20 119.9(3) . . ? 
C22 C21 H21 120.0 . . ? 
C20 C21 H21 120.0 . . ? 
C21 C22 C23 120.1(3) . . ? 
C21 C22 H22 119.9 . . ? 
C23 C22 H22 119.9 . . ? 
C22 C23 C24 120.2(3) . . ? 
C22 C23 H23 119.9 . . ? 
C24 C23 H23 119.9 . . ? 
C19 C24 C23 120.5(3) . . ? 
C19 C24 H24 119.7 . . ? 
C23 C24 H24 119.7 . . ? 
C4 C25 H25A 109.5 . . ? 
C4 C25 H25B 109.5 . . ? 
H25A C25 H25B 109.5 . . ? 
C4 C25 H25C 109.5 . . ? 
H25A C25 H25C 109.5 . . ? 
H25B C25 H25C 109.5 . . ? 
O2 C26 H26A 109.5 . . ? 
O2 C26 H26B 109.5 . . ? 
H26A C26 H26B 109.5 . . ? 
O2 C26 H26C 109.5 . . ? 
H26A C26 H26C 109.5 . . ? 
H26B C26 H26C 109.5 . . ? 
O3 C27 H27A 109.5 . . ? 
O3 C27 H27B 109.5 . . ? 
H27A C27 H27B 109.5 . . ? 
O3 C27 H27C 109.5 . . ? 
H27A C27 H27C 109.5 . . ? 
H27B C27 H27C 109.5 . . ? 
  
loop_ 
 _geom_torsion_atom_site_label_1 
 _geom_torsion_atom_site_label_2 
 _geom_torsion_atom_site_label_3 
 _geom_torsion_atom_site_label_4 
 _geom_torsion 
 _geom_torsion_site_symmetry_1 
 _geom_torsion_site_symmetry_2 
 _geom_torsion_site_symmetry_3 
 _geom_torsion_site_symmetry_4 
 _geom_torsion_publ_flag 
O1 C1 C2 C3 -178.4(3) . . . . ? 
C6 C1 C2 C3 1.4(4) . . . . ? 
C1 C2 C3 C4 -1.1(4) . . . . ? 
C2 C3 C4 C5 -1.0(4) . . . . ? 
C2 C3 C4 C25 176.4(3) . . . . ? 
C3 C4 C5 C6 2.7(4) . . . . ? 
C25 C4 C5 C6 -174.6(2) . . . . ? 
C3 C4 C5 C10 -176.7(2) . . . . ? 
C25 C4 C5 C10 5.9(4) . . . . ? 
C4 C5 C6 C1 -2.4(3) . . . . ? 
C10 C5 C6 C1 177.1(2) . . . . ? 
C4 C5 C6 C7 174.0(2) . . . . ? 
C10 C5 C6 C7 -6.5(3) . . . . ? 
C2 C1 C6 C5 0.3(4) . . . . ? 
O1 C1 C6 C5 -179.8(2) . . . . ? 
C2 C1 C6 C7 -176.3(2) . . . . ? 
O1 C1 C6 C7 3.6(3) . . . . ? 
C5 C6 C7 C8 6.6(3) . . . . ? 
C1 C6 C7 C8 -176.9(2) . . . . ? 
C6 C7 C8 C9 -33.8(3) . . . . ? 
C6 C7 C8 C13 89.7(2) . . . . ? 
C7 C8 C9 C10 61.8(2) . . . . ? 
C13 C8 C9 C10 -63.0(2) . . . . ? 
C8 C9 C10 C11 59.2(2) . . . . ? 
C8 C9 C10 C5 -61.9(2) . . . . ? 
C6 C5 C10 C9 33.8(3) . . . . ? 
C4 C5 C10 C9 -146.7(2) . . . . ? 
C6 C5 C10 C11 -87.4(2) . . . . ? 
C4 C5 C10 C11 92.1(3) . . . . ? 
C9 C10 C11 C12 -30.3(3) . . . . ? 
C5 C10 C11 C12 91.1(2) . . . . ? 
C9 C10 C11 C17 152.1(2) . . . . ? 
C5 C10 C11 C17 -86.5(3) . . . . ? 
C17 C11 C12 C14 1.9(3) . . . . ? 
C10 C11 C12 C14 -175.77(19) . . . . ? 
C17 C11 C12 C13 -177.98(19) . . . . ? 
C10 C11 C12 C13 4.3(3) . . . . ? 
C11 C12 C13 C18 115.4(2) . . . . ? 
C14 C12 C13 C18 -64.5(3) . . . . ? 
C11 C12 C13 C8 -7.1(3) . . . . ? 
C14 C12 C13 C8 173.00(19) . . . . ? 
C9 C8 C13 C12 36.1(3) . . . . ? 
C7 C8 C13 C12 -87.0(2) . . . . ? 
C9 C8 C13 C18 -89.0(2) . . . . ? 
C7 C8 C13 C18 147.90(19) . . . . ? 
C11 C12 C14 C15 -0.4(3) . . . . ? 
C13 C12 C14 C15 179.48(19) . . . . ? 
C26 O2 C15 C14 -17.6(3) . . . . ? 
C26 O2 C15 C16 164.1(2) . . . . ? 
C12 C14 C15 O2 -179.3(2) . . . . ? 
C12 C14 C15 C16 -1.0(3) . . . . ? 
O2 C15 C16 C17 179.2(2) . . . . ? 
C14 C15 C16 C17 0.8(3) . . . . ? 
O2 C15 C16 O3 2.0(3) . . . . ? 
C14 C15 C16 O3 -176.5(2) . . . . ? 
C27 O3 C16 C17 108.5(3) . . . . ? 
C27 O3 C16 C15 -74.2(3) . . . . ? 
C15 C16 C17 C11 0.7(4) . . . . ? 
O3 C16 C17 C11 178.1(2) . . . . ? 
C12 C11 C17 C16 -2.1(3) . . . . ? 
C10 C11 C17 C16 175.6(2) . . . . ? 
C12 C13 C18 O4 -25.2(3) . . . . ? 
C8 C13 C18 O4 101.4(2) . . . . ? 
C12 C13 C18 C19 157.1(2) . . . . ? 
C8 C13 C18 C19 -76.3(2) . . . . ? 
O4 C18 C19 C24 -4.7(4) . . . . ? 
C13 C18 C19 C24 173.1(2) . . . . ? 
O4 C18 C19 C20 174.9(2) . . . . ? 
C13 C18 C19 C20 -7.3(3) . . . . ? 
C24 C19 C20 C21 1.0(4) . . . . ? 
C18 C19 C20 C21 -178.6(3) . . . . ? 
C19 C20 C21 C22 -0.8(5) . . . . ? 
C20 C21 C22 C23 -0.1(6) . . . . ? 
C21 C22 C23 C24 0.6(6) . . . . ? 
C20 C19 C24 C23 -0.5(4) . . . . ? 
C18 C19 C24 C23 179.1(3) . . . . ? 
C22 C23 C24 C19 -0.3(5) . . . . ? 
  
loop_ 
 _geom_hbond_atom_site_label_D 
 _geom_hbond_atom_site_label_H 
 _geom_hbond_atom_site_label_A 
 _geom_hbond_distance_DH 
 _geom_hbond_distance_HA 
 _geom_hbond_distance_DA 
 _geom_hbond_angle_DHA 
 _geom_hbond_site_symmetry_A 
O1 H1 O2  0.82 2.08 2.809(2) 148.7 1_556 
  
_diffrn_measured_fraction_theta_max    1.000 
_diffrn_reflns_theta_full              26.49 
_diffrn_measured_fraction_theta_full   1.000 
_refine_diff_density_max    0.212 
_refine_diff_density_min   -0.201 
_refine_diff_density_rms    0.036 
  
